# Supplementary material
Source: PubMed Central journal article supplement (PMC4385431)
Supplement: NIHMS662413-supplement.pdf [file NIHMS662413-supplement.pdf]

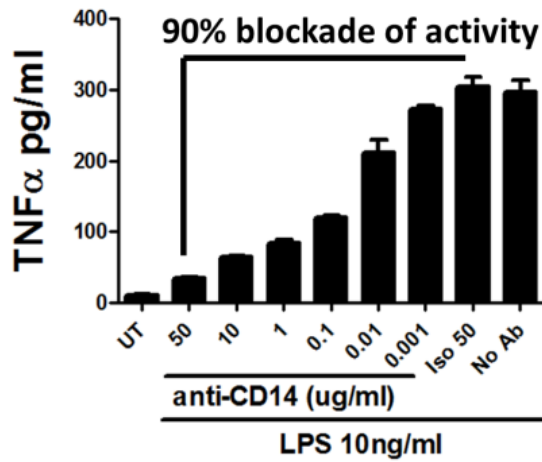

**Figure S1. Optimization of anti-CD14 blocking antibody concentration in NP uptake experiments.** ELISA for TNF $\alpha$  production by THP-1 cells following CD14 blockade at indicated doses in the presence of LPS (10 ng/ml). Iso 50, 50ug/ml isotype control. No Ab, absence of antibody. UT, untreated cells.

### A. Pre-CD14 isolation

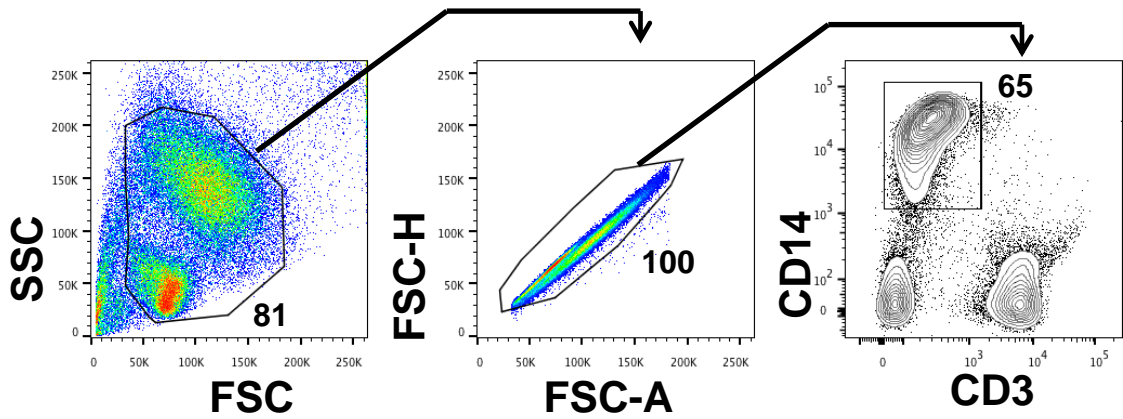

### B. Post-CD14 isolation

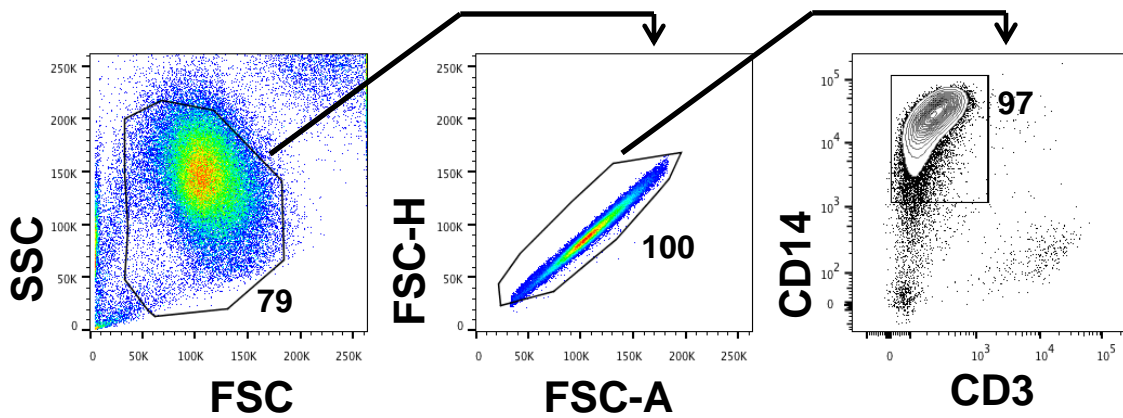

**Figure S2. Purity of untouched CD14<sup>+</sup> monocytes isolated from mixed buffy coat samples by magnet based negative selection. (A) Flow cytometric analysis of buffy coat cells prior to CD14<sup>+</sup> cell isolation. (B) Purity of CD14<sup>+</sup> cells following magnet based isolation.**
